# Supplementary material for: Endoplasmic Reticulum Stress Promotes Colorectal Cancer Proliferation by Regulating Autophagy via XBP1s
Source: Research Square preprint supplement (doi:10.21203/rs.3.rs-7981202/v1), 2025-12-30

Table S1:

XBP1s-siRNA Sequences:

| Name         |           | Sequence Information (5'-3') |
|--------------|-----------|------------------------------|
| siRNA-NC     | sense     | UUCUCCGAACGUGUCACGUTT        |
|              | Antisense | ACGUGACACGUUCGGAGAATT        |
| FAM siRNA-NC | sense     | UUCUCCGAACGUGUCACGUTT        |
|              | Antisense | ACGUGACACGUUCGGAGAATT        |
| si-XBP1s#1   | sense     | GGAACAGCAAGUGGUAGAUTT        |
|              | Antisense | AUCUACCACUUGCUGUUCCTT        |
| si-XBP1s#2   | sense     | CCAGUCAUGUUCUCAAUAUTT        |
|              | Antisense | AUUUGAAGAACAUGACUGGTT        |
| si-XBP1s#3   | sense     | GAUCGAAAGAAGGCUCGAATT        |
|              | Antisense | UUCGAGCCUUCUUCGAUCTT         |
| si-XBP1s#4   | sense     | GCCUUGUAGUUGAGAACCATT        |
|              | Antisense | UGGUUCUCAACUACAAGGCTT        |

Table S2:

XBP1s and  $\beta$ -ACTIN Primer Sequences:

| Gene Name      |   | Primer Sequence (5'-3') |
|----------------|---|-------------------------|
| $\beta$ -ACTIN | F | GCGTGACATTAAGGAGAAGC    |
|                | R | CCACGTCACACTTCATGATGG   |
| XBP1s          | F | CTGAGTCCGCAGCAGGTGCAG   |
|                | R | CCAGAATGCCCAACAGGATA    |

Figure 1C. Protein expression levels of XBP1s in 10 colorectal cancer tissues were detected by WB.

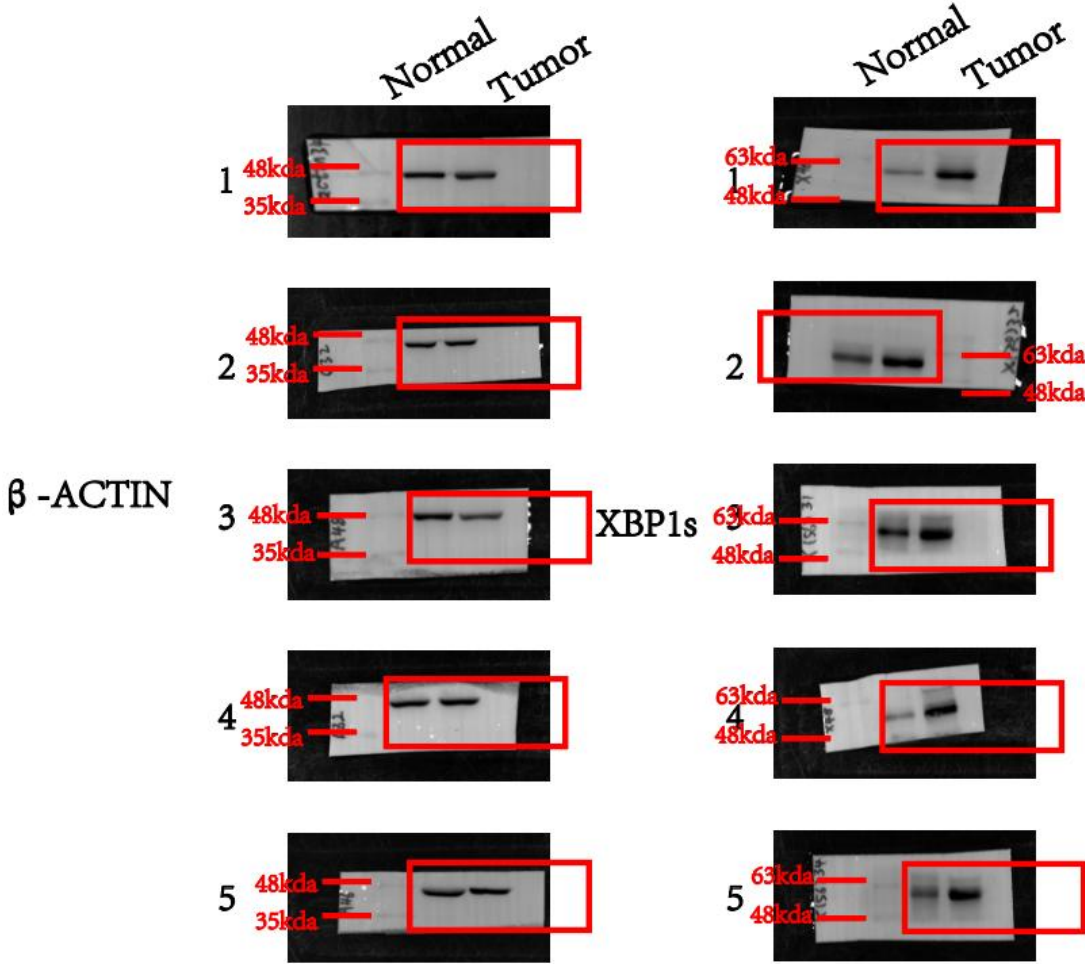

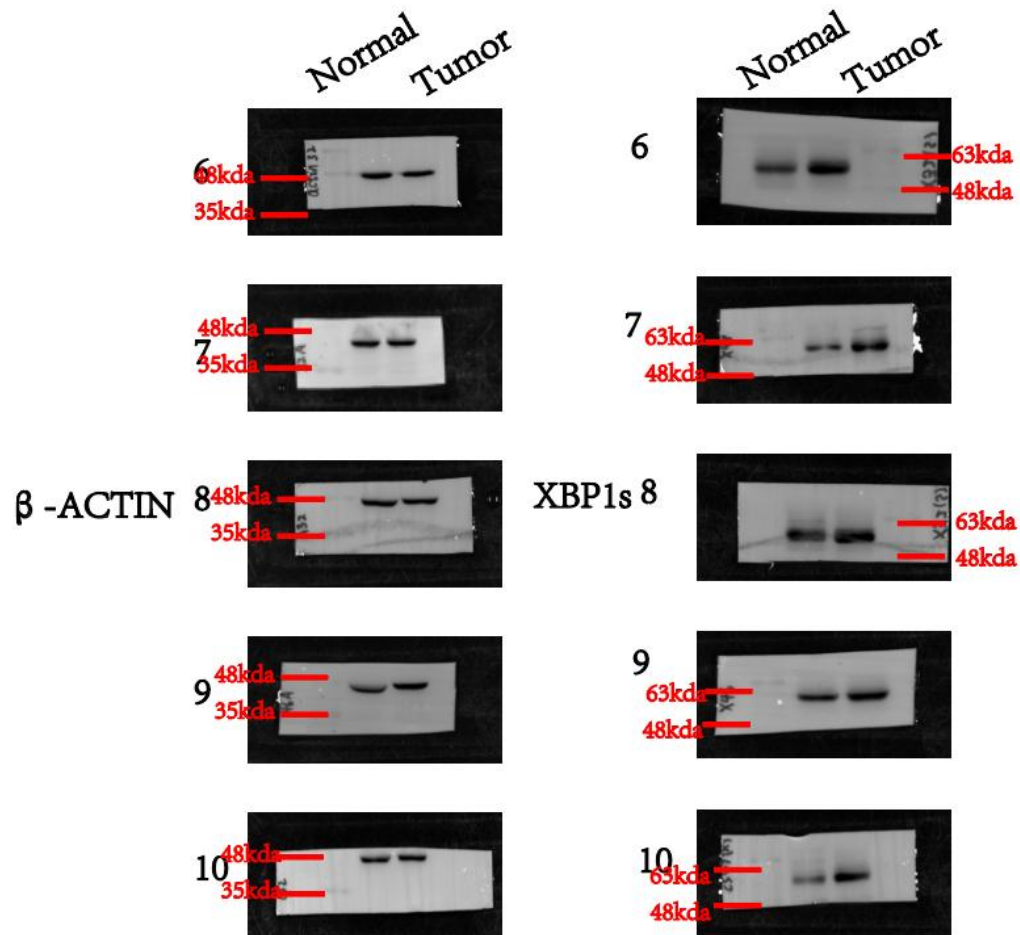

Figure 3C. Effect of different concentrations of tunicamycin on XBP1s protein expression in RKO cells.

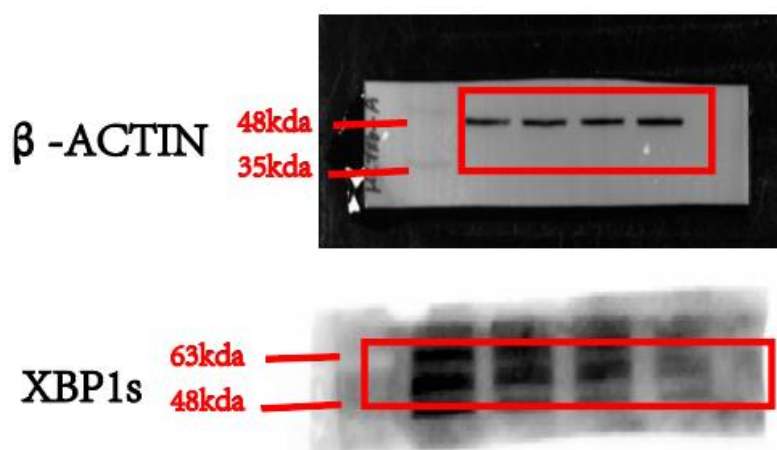

Figure 3H. Knockdown efficiency of XBP1s protein in RKO cell, as detected by WB.

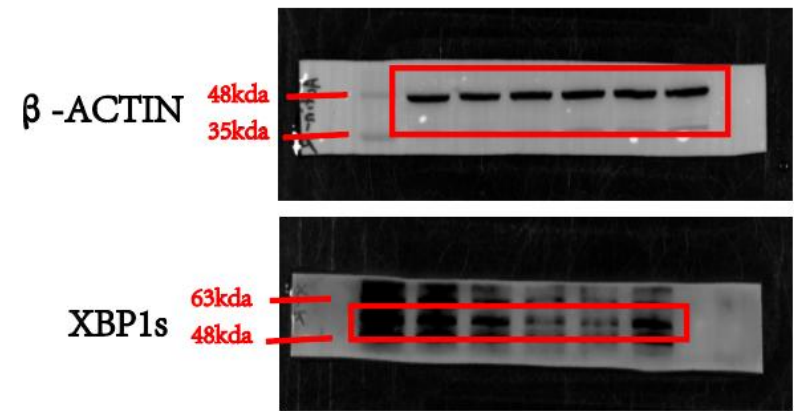

Figure 3J. Knockdown efficiency of XBP1s protein in HCT116 cell, as detected by WB.

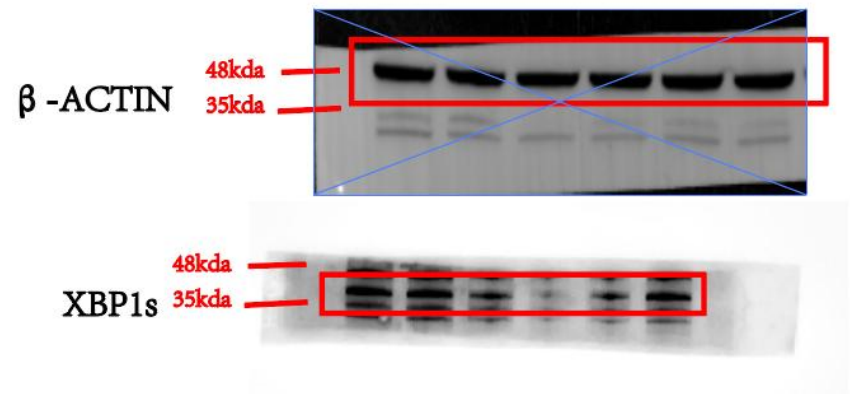

Figure 5C. Expression of downstream proteins of endoplasmic reticulum stress (ERS) in RKO cells, as detected by WB.

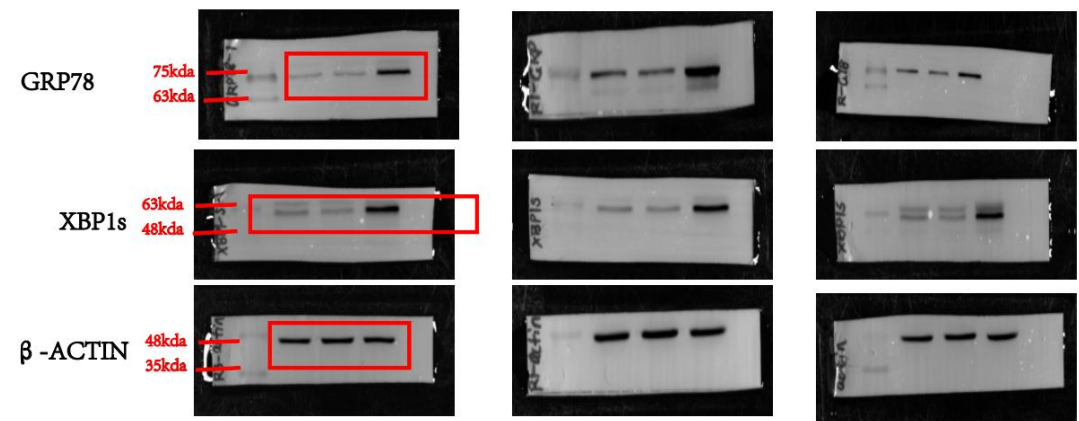

Figure 5D. Expression of downstream proteins of ERS in HCT116 cells, as detected by WB.

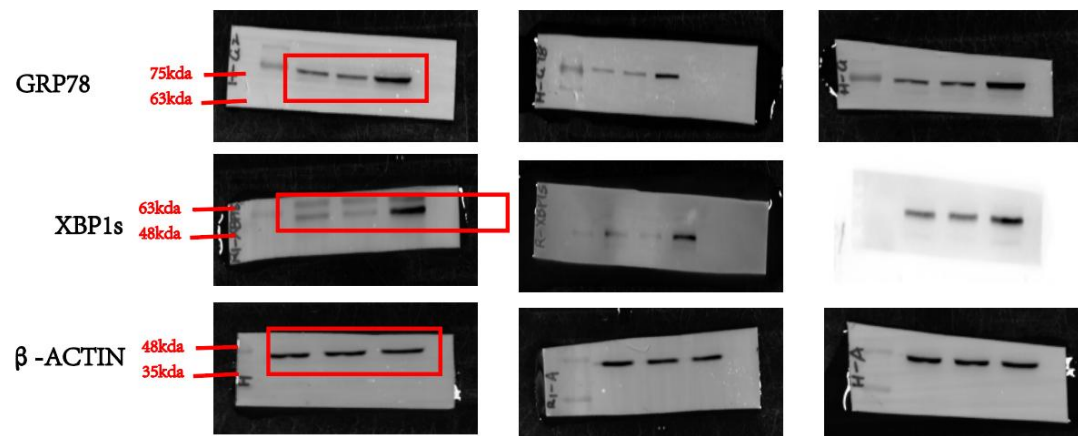

Figure6A.Changes in autophagy-related proteins following inhibition of XBP1s expression by tunicamycin in RKO cells.

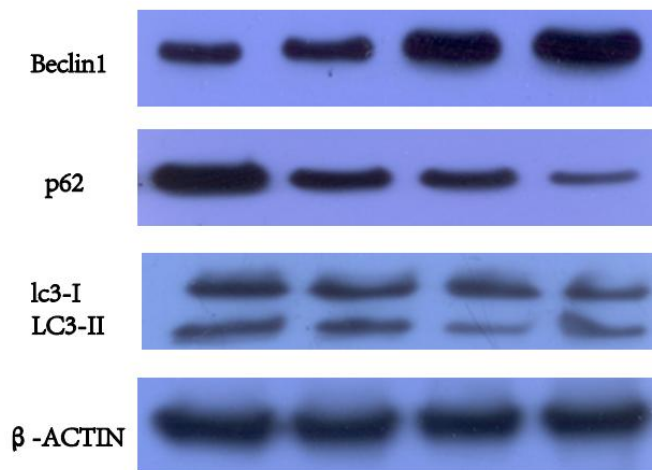

Figure6B.Effect of tunicamycin-induced ERS on the autophagy signaling pathway in RKO cells.

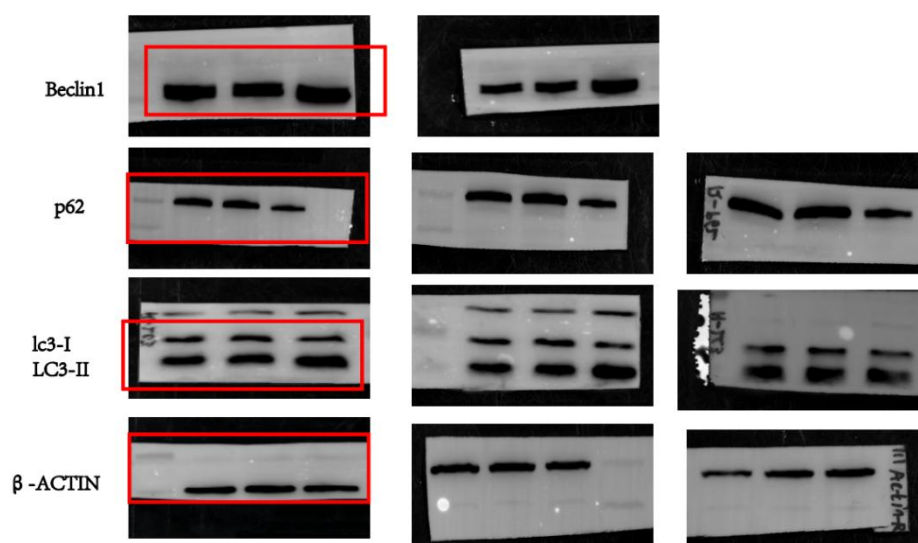

Figure6C.Effect of tunicamycin-induced ERS on the autophagy signaling pathway in HCT116 cells.

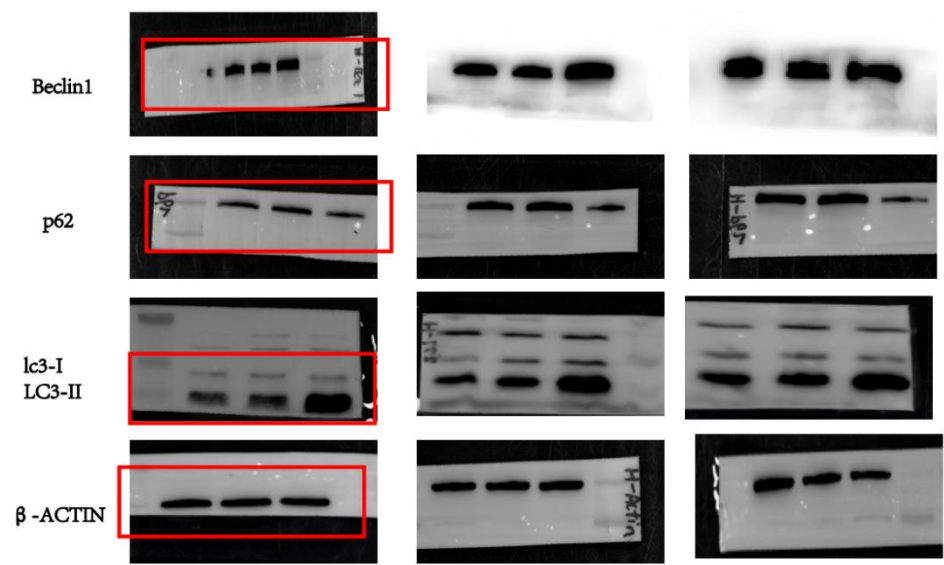

Figure6D.Effect of XBP1s knockdown on the autophagy signaling pathway in RKO cells under the ERS model.

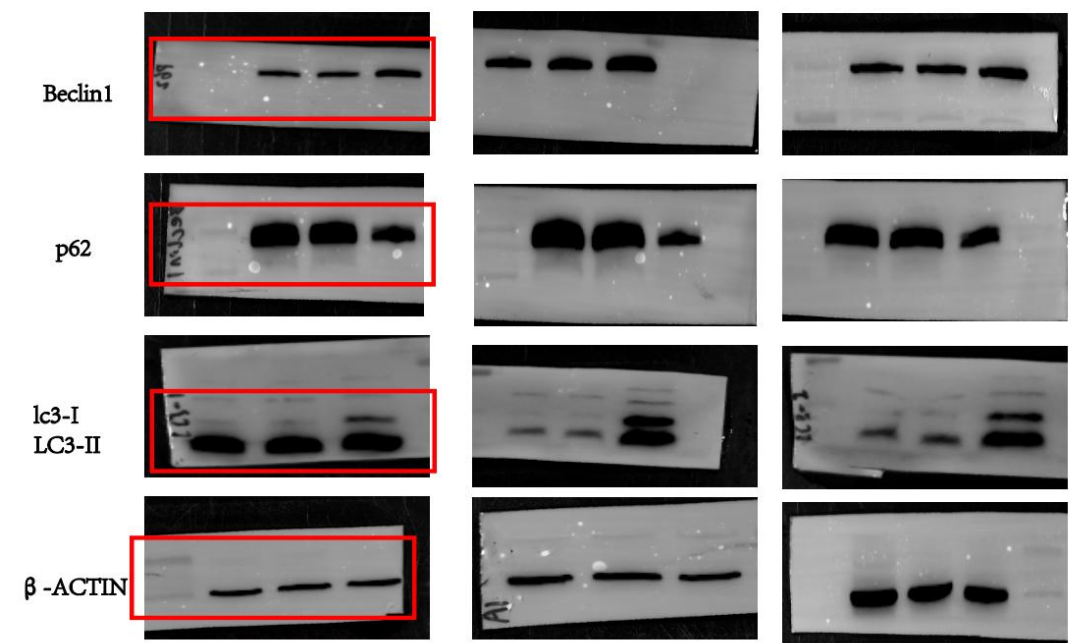

Figure6E.Effect of XBP1s knockdown on the autophagy signaling pathway in HCT116 cells under the ERS model.

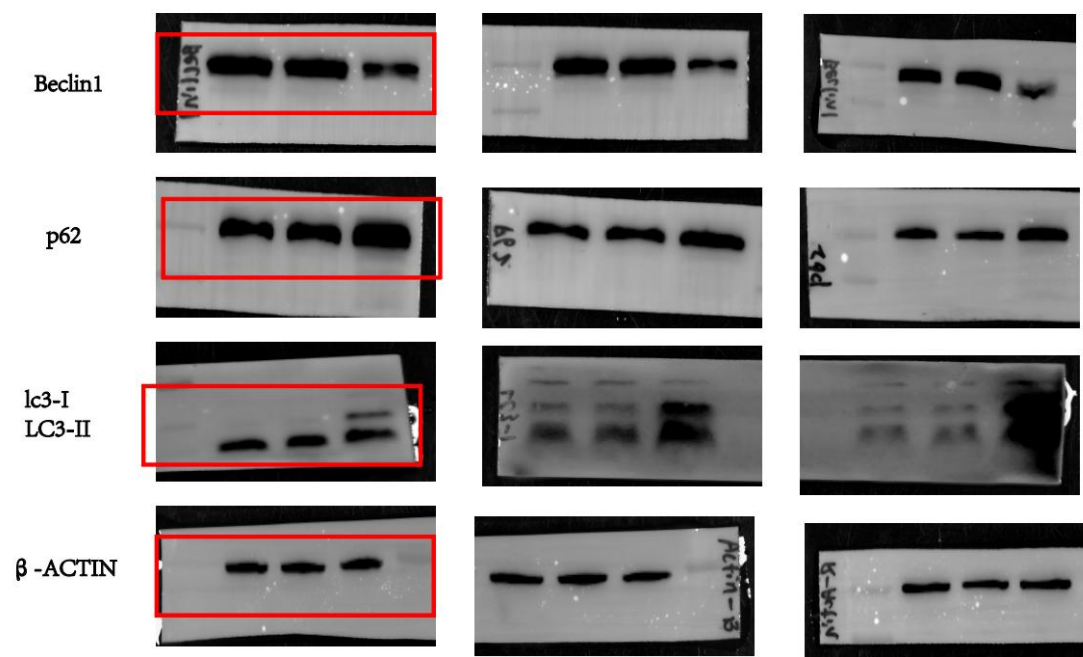

Supplement: Supplementary file 1 [file 4381391c1b9c66d83d2429a8.pdf]
